# Supplementary material
Source: PubMed Central journal article supplement (PMC4475444)
Supplement: NIHMS647063-supplement-Supp_TableS1.pdf [file NIHMS647063-supplement-Supp_TableS1.pdf]

Supplemental Table 1. Enrichment values

|                                              | Sig. SNP set | Full IL SNP set | Sig. SNP set | Full IL SNP set |                 |
|----------------------------------------------|--------------|-----------------|--------------|-----------------|-----------------|
| Kegg Pathway                                 | #genes       | #genes          | adjP-value   | adjP-value      | Fold Enrichment |
| NOD-like receptor signaling pathway          | 4            | 4               | 6.01E-09     | 1.28E-07        | 21.30           |
| Cytosolic DNA-sensing pathway                | 3            | 3               | 8.45E-07     | 1.07E-05        | 12.66           |
| Prion diseases                               | 3            | 3               | 2.46E-07     | 2.66E-06        | 10.81           |
| Osteoclast differentiation                   | 3            | 3               | 9.67E-06     | 0.0001          | 10.34           |
| Pathways in cancer                           | 2            | 2               | 0.0042       | 0.0229          | 5.45            |
| MAPK signaling pathway                       | 3            | 4               | 7.45E-05     | 4.34E-05        | 0.58            |
| Toll-like receptor signaling pathway         | 4            | 5               | 4.29E-08     | 1.94E-08        | 0.45            |
| Rheumatoid arthritis                         | 5            | 6               | 2.73E-10     | 1.19E-10        | 0.44            |
| Apoptosis                                    | 4            | 5               | 2.51E-08     | 9.35E-09        | 0.37            |
| Malaria                                      | 5            | 6               | 2.78E-11     | 3.92E-12        | 0.14            |
| RIG-I-like receptor signaling pathway        | 2            | 3               | 0.0002       | 2.09E-05        | 0.10            |
| Graft-versus-host disease                    | 3            | 4               | 3.73E-07     | 3.66E-08        | 0.10            |
| Toxoplasmosis                                | 3            | 5               | 1.00E-05     | 6.31E-08        | 0.01            |
| Leishmaniasis                                | 4            | 6               | 1.29E-08     | 3.07E-11        | 2.38E-03        |
| Type I diabetes mellitus                     | 3            | 5               | 4.02E-07     | 2.68E-10        | 6.67E-04        |
| African trypanosomiasis                      | 4            | 6               | 9.89E-10     | 5.09E-13        | 5.15E-04        |
| Amoebiasis                                   | 5            | 8               | 4.74E-10     | 4.14E-14        | 8.73E-05        |
| Chagas disease (American trypanosomiasis)    | 4            | 7               | 4.29E-08     | 2.90E-12        | 6.76E-05        |
| Allograft rejection                          | 2            | 6               | 6.72E-05     | 6.38E-13        | 9.49E-09        |
| Intestinal immune network for IgA production | 2            | 7               | 0.0001       | 2.33E-14        | 2.33E-10        |
| Hematopoietic cell lineage                   | 5            | 11              | 2.73E-10     | 9.81E-22        | 3.59E-12        |
| Jak-STAT signaling pathway                   | 5            | 21              | 2.32E-09     | 6.57E-44        | 2.83E-35        |
| Cytokine-cytokine receptor interaction       | 11           | 28              | 6.78E-22     | 3.29E-58        | 4.85E-37        |
