# Supplementary material
Source: PubMed Central journal article supplement (PMC4475444)
Supplement: NIHMS647063-supplement-Supp_TableS2.pdf [file NIHMS647063-supplement-Supp_TableS2.pdf]

| Supplemental Table 2. Studies that have found associations between rs17561 and various outcomes and traits                     |                  |                                               |                                                                                                    |          |          |                                  |           |                        |                                  |
|--------------------------------------------------------------------------------------------------------------------------------|------------------|-----------------------------------------------|----------------------------------------------------------------------------------------------------|----------|----------|----------------------------------|-----------|------------------------|----------------------------------|
| Study Title                                                                                                                    | URL              | Authors                                       | Publication Details                                                                                | Resource | Type     | Identifiers                      | EntrezUID | Properties             | Properties                       |
| Ovarian cancer risk associated with inherited inflammation-related variants.                                                   | /pubmed/22282663 | White KL, Schildkraut JM, Palmieri RT, et al. | Cancer Res. 2012 Mar 1;72(5):1064-9. doi: 10.1158/0008-5472.CAN-11-3512. Epub 2012 Jan 26.         | PubMed   | citation | PMID:22282663   PMCID:PMC293997  | 22282663  | create date:2012/01/28 | first author:White KL            |
| The associations between interleukin-1 polymorphisms and susceptibility to ankylosing spondylitis.                             | /pubmed/21962386 | Lea WI, Lee YH.                               | Joint Bone Spine. 2012 Jul;79(4):370-4. doi: 10.1016/j.jbspin.2011.06.010. Epub 2011 Oct 1.        | PubMed   | citation | PMID:21962386                    | 21962386  | create date:2011/10/04 | first author:Lea WI              |
| Association of IL1A, IL1B, ILRN, IL6, IL10 and TNF-1α polymorphisms with risk and clinical severity of Crohn's disease.        | /pubmed/21621860 | Mirowska-Guzel D, Gromadzka G, Mach A, et al. | J Neuroimmunol. 2011 Jul;236(1-2):87-92. doi: 10.1016/j.jneuroim.2011.04.014. Epub 2011 May 31.    | PubMed   | citation | PMID:21621860                    | 21621860  | create date:2011/05/31 | first author:Mirowska-Guzel D    |
| Coding single-nucleotide polymorphisms of interleukin-1 gene cluster are not associated with Crohn's disease.                  | /pubmed/21279638 | Kim SK, Kang SW, Chung JH, et al.             | Pediatr Cardiol. 2011 Apr;32(4):381-5. doi: 10.1007/s00246-010-9858-7. Epub 2011 Jan 30.           | PubMed   | citation | PMID:21279638                    | 21279638  | create date:2011/02/01 | first author:Kim SK              |
| Genetic variants in inflammation-related genes are associated with radiation-induced cognitive decline in Alzheimer's disease. | /pubmed/20811626 | Hildebrandt MA, Komaki R, Liao Z, et al.      | PLoS One. 2010 Aug 25;5(8):e12402. doi: 10.1371/journal.pone.0012402.                              | PubMed   | citation | PMID:20811626   PMCID:PMC2928273 | 20811626  | create date:2010/09/03 | first author:Hildebrandt MA      |
| CCL3 genotype and current depression increase risk of HIV-associated dementia.                                                 | /pubmed/20725607 | Levine AJ, Singer EJ, Sinsheimer JS, et al.   | Neurobehav HIV Med. 2009 Nov;1:1-7.                                                                | PubMed   | citation | PMID:20725607   PMCID:PMC2923399 | 20725607  | create date:2010/08/21 | first author:Levine AJ           |
| Candidate malaria susceptibility/protective SNPs in hospital and population-based studies.                                     | /pubmed/20459687 | Eid NA, Hussein AA, Elzein AM, et al.         | Malar J. 2010 May 8;9:119. doi: 10.1186/1475-2875-9-119.                                           | PubMed   | citation | PMID:20459687   PMCID:PMC2877684 | 20459687  | create date:2010/05/13 | first author:Eid NA              |
| The interleukin-1 cluster gene region is associated with multiple sclerosis in an Italian population.                          | /pubmed/20192980 | Borzani I, Tola MR, Caniatti L, et al.        | Eur J Neurol. 2010 Jul;17(7):930-8. doi: 10.1111/j.1468-1331.2010.02952.x. Epub 2010 Feb 23.       | PubMed   | citation | PMID:20192980                    | 20192980  | create date:2010/03/03 | first author:Bozrani I           |
| Association of IL1A, IL1B, and TNF gene polymorphisms with chronic rhinosinusitis.                                             | /pubmed/20157068 | Mfuna Endam L, Cormier C, et al.              | Arch Otolaryngol Head Neck Surg. 2010 Feb;136(2):187-92. doi: 10.1001/archoto.2009.219.            | PubMed   | citation | PMID:20157068                    | 20157068  | create date:2010/02/17 | first author:Mfuna Endam L       |
| Cytokine polymorphism in patients with migraine: some suggestive clues of migration.                                           | /pubmed/20113413 | Yilmaz IA, Ozge A, Erdal ME, et al.           | Pain Med. 2010 Apr;11(4):492-7. doi: 10.1111/j.1526-4637.2009.00791.x. Epub 2010 Jan 22.           | PubMed   | citation | PMID:20113413                    | 20113413  | create date:2010/02/02 | first author:Yilmaz IA           |
| Radiographic severity of knee osteoarthritis is conditional on interleukin 1 receptor 1 polymorphisms.                         | /pubmed/19934104 | Attur M, Wang HY, Kraus VB, et al.            | Ann Rheum Dis. 2010 May;69(5):856-61. doi: 10.1136/ard.2009.113043. Epub 2009 Nov 23.              | PubMed   | citation | PMID:19934104   PMCID:PMC2925146 | 19934104  | create date:2009/11/26 | first author:Attur M             |
| Parasites represent a major selective force for interleukin genes and shape the genetic architecture of the human genome.      | /pubmed/19468064 | Fumagalli M, Pozzoli U, et al.                | J Exp Med. 2009 Jun 8;206(6):1395-408. doi: 10.1084/jem.20082779. Epub 2009 May 25.                | PubMed   | citation | PMID:19468064   PMCID:PMC2715056 | 19468064  | create date:2009/05/27 | first author:Fumagalli M         |
| Cytokine SNPs: Comparison of allele frequencies by race and implications for future studies.                                   | /pubmed/19356949 | Van Dyke AL, Cote ML, et al.                  | Cytokine. 2009 May;46(2):236-44. doi: 10.1016/j.cyto.2009.02.003. Epub 2009 Apr 7.                 | PubMed   | citation | PMID:19356949   PMCID:PMC2742911 | 19356949  | create date:2009/04/10 | first author:Van Dyke AL         |
| Organochlorine exposure, immune gene variation, and risk of non-Hodgkin lymphoma.                                              | /pubmed/19066394 | Colt JS, Rothman N, Severson RK, et al.       | Blood. 2009 Feb 26;113(9):1899-905. doi: 10.1182/blood-2008-04-153858. Epub 2008 Dec 9.            | PubMed   | citation | PMID:19066394   PMCID:PMC2651009 | 19066394  | create date:2008/12/11 | first author:Colt JS             |
| Association of -31T>C and -511 C>T polymorphisms in the interleukin 1 beta (IL1B) gene with psoriasis.                         | /pubmed/19043479 | Kim SH, Mok JW, Kim HS, et al.                | Mol Vis. 2008;14:2109-16. Epub 2008 Nov 21.                                                        | PubMed   | citation | PMID:19043479   PMCID:PMC2588426 | 19043479  | create date:2008/12/02 | first author:Kim SH              |
| Cytokine gene polymorphisms as risk and severity factors for juvenile dermatomyositis.                                         | /pubmed/19035492 | Mamyrova G, O'Hanlon TP, et al.               | Arthritis Rheum. 2008 Dec;58(12):3941-50. doi: 10.1002/art.24039.                                  | PubMed   | citation | PMID:19035492   PMCID:PMC2674642 | 19035492  | create date:2008/11/28 | first author:Mamyrova G          |
| Large-scale evaluation of candidate genes identifies associations between DNA methylation and Crohn's disease.                 | /pubmed/18978339 | Lan Q, Zhang L, Shen M, et al.                | Carcinogenesis. 2009 Jan;30(1):50-8. doi: 10.1093/carcin/bgn249. Epub 2008 Oct 31.                 | PubMed   | citation | PMID:18978339   PMCID:PMC2639030 | 18978339  | create date:2008/11/04 | first author:Lan Q               |
| Interleukin-1 promoter region polymorphism role in rheumatoid arthritis: a meta-analysis.                                      | /pubmed/18838388 | Harrison P, Poulton JJ, Chapman K, et al.     | Rheumatology (Oxford). 2008 Dec;47(12):1768-70. doi: 10.1093/rheumatology/ken374. Epub 2008 Oct 4. | PubMed   | citation | PMID:18838388                    | 18838388  | create date:2008/10/08 | first author:Harrison P          |
| Ischemic stroke risk, smoking, and the genetics of inflammation in a biracial population.                                      | /pubmed/18727828 | Cole JW, Brown DW, Giles WH, et al.           | Thromb J. 2008 Aug 26;8:11. doi: 10.1186/1477-9560-6-11.                                           | PubMed   | citation | PMID:18727828   PMCID:PMC2533289 | 18727828  | create date:2008/08/30 | first author:Cole JW             |
| Variants in inflammation genes and the risk of biliary tract cancers and stones: a population-based study.                     | /pubmed/18676870 | Hsing AW, Sakoda LC, Rashid A, et al.         | Cancer Res. 2008 Aug 15;68(15):6442-52. doi: 10.1158/0008-5472.CAN-08-0444.                        | PubMed   | citation | PMID:18676870   PMCID:PMC2860726 | 18676870  | create date:2008/08/05 | first author:Hsing AW            |
| Genetics of psoriasis and psoriatic arthritis: update and future direction.                                                    | /pubmed/18633131 | Habermann TM, Wang SS, Maurer MJ, et al.      | Blood. 2008 Oct 1;112(7):2694-702. doi: 10.1182/blood-2007-09-111658. Epub 2008 Jul 16.            | PubMed   | citation | PMID:18633131   PMCID:PMC2556607 | 18633131  | create date:2008/07/18 | first author:Habermann TM        |
| A broad analysis of IL1 polymorphism and rheumatoid arthritis.                                                                 | /pubmed/18609743 | Duffin KC, Chandran V, Gladman DD, et al.     | J Rheumatol. 2008 Jul;35(7):1449-53. Review.                                                       | PubMed   | citation | PMID:18609743   PMCID:PMC2724000 | 18609743  | create date:2008/07/09 | first author:Duffin KC           |
| Differential allelic expression in the human genome: a robust approach to identify differentially expressed genes.             | /pubmed/18576312 | Johnsen AK, Plenge RM, Butty V, et al.        | Arthritis Rheum. 2008 Jul;58(7):1947-57. doi: 10.1002/art.23592.                                   | PubMed   | citation | PMID:18576312   PMCID:PMC2533126 | 18576312  | create date:2008/06/26 | first author:Johnsen AK          |
| Prospective meta-analysis of interleukin 1 gene complex polymorphisms confirms their association with Crohn's disease.         | /pubmed/18454203 | Serre D, Gurd S, Ge B, et al.                 | PLoS Genet. 2008 Feb 29;4(2):e1000006. doi: 10.1371/journal.pgen.1000006.                          | PubMed   | citation | PMID:18454203   PMCID:PMC2265535 | 18454203  | create date:2008/05/06 | first author:Serre D             |
| Optimization of candidate gene SNP genotyping by flexible oligonucleotide microarrays.                                         | /pubmed/18063673 | Sims AM, Timms AE, Bruges-Armas J, et al.     | Ann Rheum Dis. 2008 Sep;67(9):1305-9. Epub 2007 Dec 6.                                             | PubMed   | citation | PMID:18063673                    | 18063673  | create date:2007/12/08 | first author:Sims AM             |
| Association between interleukin-1 polymorphisms and Crohn's disease.                                                           | /pubmed/17932347 | Sigurdson AJ, Bhatti P, Doody MM, et al.      | Cancer Epidemiol Biomarkers Prev. 2007 Oct;16(10):2000-7.                                          | PubMed   | citation | PMID:17932347                    | 17932347  | create date:2007/10/13 | first author:Sigurdson AJ        |
| Polymorphisms in apoptosis- and proliferation-related genes, ionizing radiation exposure, and risk of Crohn's disease.         | /pubmed/17705862 | Pullat J, Fleischer R, Becker N, et al.       | BMC Genomics. 2007 Aug 17;8:282.                                                                   | PubMed   | citation | PMID:17705862   PMCID:PMC1994959 | 17705862  | create date:2007/08/21 | first author:Pullat J            |
| Association of interleukin-6 and interleukin-10 genotypes with radiographic damage in rheumatoid arthritis.                    | /pubmed/17665434 | Marinou I, Healy J, Mewar D, et al.           | Arthritis Rheum. 2007 Aug;56(8):2549-56.                                                           | PubMed   | citation | PMID:17665434   PMCID:PMC2435416 | 17665434  | create date:2007/08/01 | first author:Marinou I           |
| Prognostic significance of host immune gene polymorphisms in follicular lymphoma.                                              | /pubmed/17327408 | Cerhan JR, Wang S, Maurer MJ, et al.          | Blood. 2007 Jun 15;109(12):5439-46. Epub 2007 Feb 27.                                              | PubMed   | citation | PMID:17327408   PMCID:PMC1890834 | 17327408  | create date:2007/03/01 | first author:Cerhan JR           |
| Association between the interleukin-1 family gene cluster and psoriatic arthritis.                                             | /pubmed/16918024 | Rahman P, Sun S, Peddle L, et al.             | Arthritis Rheum. 2006 Jul;54(7):2321-5.                                                            | PubMed   | citation | PMID:16918024                    | 16918024  | create date:2006/08/19 | first author:Rahman P            |
| Interleukin gene polymorphisms and breast cancer: a case control study and systematic review.                                  | /pubmed/16842617 | Balasuubramanian SP, Azmy IA, et al.          | BMC Cancer. 2006 Jul 14;6:188.                                                                     | PubMed   | citation | PMID:16842617   PMCID:PMC1553474 | 16842617  | create date:2006/07/18 | first author:Balasuubramanian SP |
| Inflammatory gene polymorphisms and risk of postoperative myocardial infarction.                                               | /pubmed/16820586 | Podgoreanu MV, White WD, Morris RW, et al.    | Circulation. 2006 Jul 4;114(1 Suppl):I275-81.                                                      | PubMed   | citation | PMID:16820586   PMCID:PMC1945056 | 16820586  | create date:2006/07/06 | first author:Podgoreanu MV       |
| Polymorphism in maternal LRP8 gene is associated with fetal growth.                                                            | /pubmed/16642433 | Wang L, Wang X, Laird N, et al.               | Am J Hum Genet. 2006 May;78(5):770-7. Epub 2006 Mar 10.                                            | PubMed   | citation | PMID:16642433   PMCID:PMC1474043 | 16642433  | create date:2006/04/28 | first author:Wang L              |
