# Supplementary material
Source: PubMed Central journal article supplement (PMC4475444)

# Supplementary Figure 1B

## IL1B:rs1143634

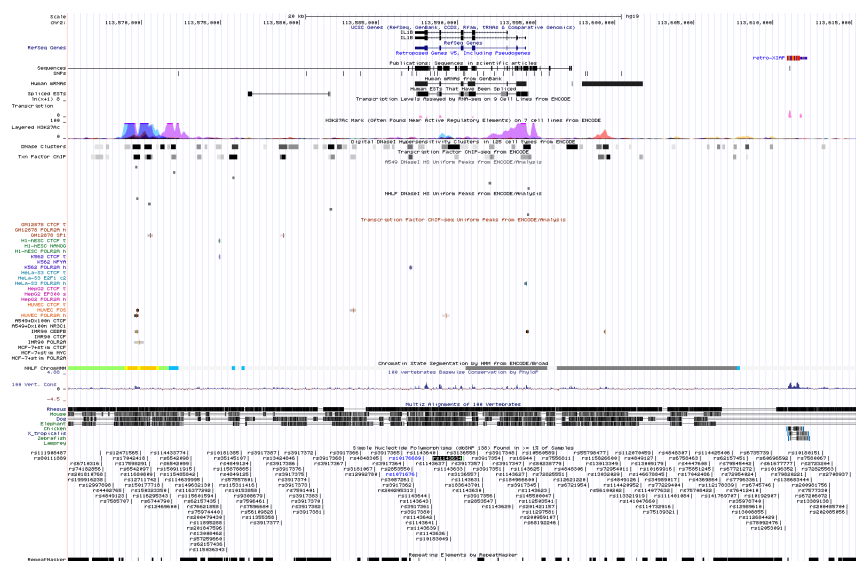

Supplement: NIHMS647063-supplement-Supp_FigureS1.pdf [file NIHMS647063-supplement-Supp_FigureS1.pdf]
